# Supplementary material for: Licinophilus depressus n. gen., sp. n. (Eugregarinida: Stenophoridae) from Licinus depressus (Coleoptera: Carabidae)
Source: PeerJ journal article supplement (doi:10.7717/peerj.20099), 2025-10-01
Supplement: Rawdata.zip [file Licinophilus depressus (raw data).xlsx]

## Sheet: Licinophilus depressus
Number	PECL	EL	EW	PL	PW	SW	DL	DW	DLA	TL	NL	NW	NDS	EL/PECL	PL/PECL	EL/EW	PL/PW	PW/SW	DL/DW	DL/PL	DW/PW	TL/EL	TL/PL	TL/DL	NL/NW
1	39.46	25.34	23.91	17,99	24.59	25,34	342.2	29.8	73.7	382.1	13.4	20.9	55.1	0.642169	0.455905	1.05981	0.731598	0.970403	11.4832	19.0217	1.21187	15.0789	21.2396	1.1166	0.641148
2	56.56	30.58	29.48	29.35	31.25	29.9	614.47	35.9	35.35	669.53	25.04	12.73	35.03	0.540665	0.518918	1.03731	0.9392	1.04515	17.1162	20.9359	1.1488	21.8944	22.8119	1.08961	1.96701
3	39.45	23.91	29.25	19.4	29.84	27.77	426.7	33.68	33.68	466.53	15.78	19.57	67.76	0.606084	0.491762	0.817436	0.650134	1.07454	12.6692	21.9948	1.12869	19.5119	24.0479	1.09334	0.806336
4	61.03	37.36	33.88	27.04	37.02	38.83	894.98	37.2	61.28	952.98	22.03	18.6	56.5	0.612158	0.443061	1.10272	0.730416	0.953387	24.0586	33.0984	1.00486	25.508	35.2433	1.06481	1.18441
5	49.98	29.23	26.16	19.7	25.98	24.22	536.93	28.51	76.32	586.34	20.21	21.16	54.49	0.584834	0.394158	1.11735	0.758276	1.07267	18.833	27.2553	1.09738	20.0595	29.7635	1.09202	0.955104
6	49.12	26.82	32.74	29.84	35.04	32.07	705.15	36.09	76.24	754.12	23.85	24.83	66.99	0.54601	0.607492	0.819181	0.851598	1.09261	19.5387	23.631	1.02997	28.1178	25.2721	1.06945	0.960532
7	50.2	25.82	26.21	24.95	27.15	27.78	686.25	31.39	69.38	733.57	26.21	15.04	52.2	0.514343	0.497012	0.98512	0.918969	0.977322	21.8621	27.505	1.15617	28.4109	29.4016	1.06895	1.74269
8	44.73	32.81	25.34	14.31	26.82	23.07	495.8	28.31	97.5	541.56	20.31	14.9	77.46	0.733512	0.31992	1.29479	0.533557	1.16255	17.5132	34.6471	1.05556	16.5059	37.8449	1.0923	1.36309
9	63.45	41.83	31.56	21.04	35.04	32.84	850.6	38.86	58.89	917.59	27.62	18.73	53.69	0.659259	0.3316	1.32541	0.600457	1.06699	21.8888	40.4278	1.10902	21.9362	43.6117	1.07876	1.47464
10	50.72	38.01	30.35	21.69	29.84	28.89	842.31	32.2	88.31	891.41	15.69	33.61	71.73	0.749409	0.427642	1.25239	0.726877	1.03288	26.1587	38.834	1.07909	23.452	41.0977	1.05829	0.466825
11	43.17	30.51	32	23.07	29.77	29.05	439.1	32.74	58.05	476.99	22.33	15.69	49.87	0.706741	0.534399	0.953438	0.774941	1.02478	13.4117	19.0334	1.09976	15.6339	20.6758	1.08629	1.4232
12	47.11	28.94	31.07	22.38	36.33	35.25	495.47	39.14	37.79	538.62	25.26	25.57	23.83	0.614307	0.475058	0.931445	0.61602	1.03064	12.6589	22.139	1.07735	18.6116	24.067	1.08709	0.987876
13	49.12	23.07	28.28	26.82	31.25	29.02	656.01	33.55	84.86	704.17	23.85	22.37	72.22	0.469666	0.54601	0.815771	0.85824	1.07684	19.5532	24.4597	1.0736	30.5232	26.2554	1.07341	1.06616
14	52.82	34.97	29.84	20.1	29.05	29.1	834.17	34.23	101.18	886.68	29.84	16.43	72.94	0.66206	0.380538	1.17192	0.69191	0.998282	24.3696	41.501	1.17831	25.3554	44.1134	1.06295	1.81619
15	55.75	32.27	29.34	22.59	30.67	27.53	532.91	33.14	62.75	588.67	23.25	17.99	38.81	0.578834	0.405202	1.09986	0.73655	1.11406	16.0806	23.5905	1.08053	18.242	26.0589	1.10463	1.29238
16	43.28	23.96	22.29	17.98	26.67	24.64	391.41	28.97	12	431.61	25.95	14.67	24.14	0.553604	0.415434	1.07492	0.674166	1.08239	13.5109	21.7692	1.08624	18.0138	24.005	1.10271	1.76892
17	32.81	19.4	26.42	11.93	28.31	28.32	483.19	33.51	35.04	511.31	11.93	19.36	23.11	0.591283	0.363609	0.734292	0.421406	0.999647	14.4193	40.5021	1.18368	26.3562	42.8592	1.0582	0.616219
18	43.92	26.21	32.81	22.43	33.55	34.29	501.87	37.31	67.16	545.45	21.89	24.09	48.5	0.596767	0.510701	0.798842	0.668554	0.978419	13.4514	22.3749	1.11207	20.8108	24.3179	1.08684	0.908676
19	42.46	23.11	18.66	24.56	21.63	23.11	390.84	25.47	71.73	429.58	23.99	14.95	64.83	0.544277	0.578427	1.23848	1.13546	0.935958	15.3451	15.9137	1.17753	18.5885	17.491	1.09912	1.60468
20	66.91	41.44	35.58	27.57	35.85	38.6	990.24	41.44	67.26	1051.09	31.68	22.4	86.64	0.619339	0.412046	1.1647	0.769038	0.928756	23.8958	35.9173	1.15593	25.3641	38.1244	1.06145	1.41429
21	74.68	43.27	41.44	29.53	41.44	41.3	1102.59	45.23	78.68	1169.13	21.7	25.84	70.84	0.579405	0.39542	1.04416	0.712597	1.00339	24.3774	37.338	1.09146	27.0194	39.5913	1.06035	0.839783
22	93.66	61.37	51.97	35.02	45.29	45.83	1048.38	48.58	41.15	1142.89	30.94	29.65	88.8	0.655242	0.373906	1.18087	0.773239	0.988217	21.5805	29.9366	1.07264	18.6229	32.6354	1.09015	1.04351
23	50.72	29.1	30.58	23.07	29.05	26.82	700.05	32.13	57.36	751.78	26.82	20.1	38.01	0.573738	0.45485	0.951602	0.794148	1.08315	21.788	30.3446	1.10602	25.8344	32.5869	1.07389	1.33433
24	51.8	27.8	29.65	22.19	28.23	29.35	557.32	33.27	78.8	607.83	27.69	16.06	65.89	0.53668	0.428378	0.937605	0.786043	0.96184	16.7514	25.1158	1.17853	21.8644	27.3921	1.09063	1.72416
25	47.6	29.05	28.28	20.1	29.84	30.54	664.94	33.35	92.39	711.04	21.59	23.82	77.5	0.610294	0.422269	1.02723	0.673592	0.977079	19.9382	33.0816	1.11763	24.4764	35.3751	1.06933	0.906381
26	50.94	29.99	26.95	26.88	32.68	29.43	548.44	31.08	78.06	597.39	29.48	11.76	63.76	0.588732	0.52768	1.1128	0.822521	1.11043	17.6461	20.4033	0.95104	19.9196	22.2243	1.08925	2.5068
27	54.33	32.02	28.51	23.85	27.57	29.77	589.59	32.87	40.34	643.07	28.36	19.4	28.51	0.589361	0.438984	1.12311	0.865071	0.9261	17.937	24.7208	1.19224	20.0834	26.9631	1.09071	1.46186
28	49.98	20.95	21.59	30.54	22.33	23.33	402.03	26.08	87.81	451.62	20.84	15.64	61.75	0.419168	0.611044	0.970357	1.36767	0.957137	15.4153	13.164	1.16794	21.557	14.7878	1.12335	1.33248
29	40.98	26.13	25.39	14.95	26.21	26.87	334.93	30.51	63.27	374.08	17.13	20.1	49.85	0.637628	0.364812	1.02915	0.570393	0.975437	10.9777	22.4033	1.16406	14.3161	25.0221	1.11689	0.852239
30	46.34	33.61	26.95	17.17	29.25	29.84	654.82	33.39	83.35	701.54	21.59	20.88	78.24	0.725291	0.370522	1.24712	0.587009	0.980228	19.6113	38.1374	1.14154	20.873	40.8585	1.07135	1.034
x	51.436	30.9627	29.5493	23.1052	30.5847	30.2538	623.79	33.931	65.656	673.676	23.2083	19.8947	57.2997	0.601362	0.449892	1.04731	0.757988	1.01938	18.128	27.6399	1.11432	21.7514	29.858	1.08409	1.24986
SD	11.7321	8.36087	6.1195	5.25899	5.20123	5.45287	209.153	5.09849	21.5757	218.612	5.0034	4.95436	18.5958	0.0734632	0.0783272	0.155167	0.178719	0.0621946	4.28058	7.97054	0.0592651	4.21156	8.25358	0.0179916	0.453652
Min	32.81	19.4	18.66	11.93	21.63	23.07	334.93	25.47	12	374.08	11.93	11.76	23.11	0.419168	0.31992	0.734292	0.421406	0.9261	10.9777	13.164	0.95104	14.3161	14.7878	1.0582	0.466825
Max	93.66	61.37	51.97	35.02	45.29	45.83	1102.59	48.58	101.18	1169.13	31.68	33.61	88.8	0.749409	0.611044	1.32541	1.36767	1.16255	26.1587	41.501	1.21187	30.5232	44.1134	1.12335	2.5068
CV	22.8092	27.0031	20.7094	22.7611	17.006	18.0238	33.5295	15.026	32.8617	32.4506	21.5586	24.9029	32.4536	12.2161	17.4102	14.8158	23.578	6.10124	23.613	28.8371	5.31852	19.3622	27.6428	1.6596	36.2961
